## The importance of leading edge vortices under simplified flapping flight conditions at the size scale of birds

Tatjana Y. Hubel and Cameron Tropea

10.1242/jeb.047886

There was an error published in *J. Exp. Biol.* **213**, 1930-1939.

In the PDF and print versions of the article, the top of Fig. 6 was inadvertently cropped. The Full Text version of the article is not affected by this error.

The correct (uncropped) version of the figure is shown below.

We apologise to authors and readers for this mistake.

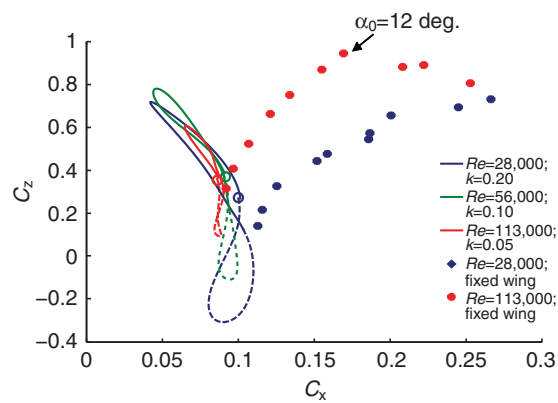

Source: https://cob.silverchair.com/jeb/article-pdf/1271015/2548.pdf
